# Supplementary material for: Impact of Optimized Protein in Infant Formula on the Metabolic and Nutritional Health in Infants: Systematic Review with Meta-Analysis
Source: Preprints.org preprint supplement (doi:10.20944/preprints201710.0195.v1), 2017-10-31
Supplement: Supplementary file 2 [file Tables Studies Meta Protein.docx]

**Table 2. Included studies in meta-analysis**

| **Author** | **Year** | **n1** | **n2** | **Protein Level (g/100Kcal) Research Group** | **Protein Level (g/100Kcal) Ctrl Group** | **Risk for random sequence generation** | **Risk for allocation concealment** | **Risk for blinding of participants and personal** | **Risk for blinding of outcome assessment** | **Risk for incomplete outcome data report** | **Risk for selective reporting** | **Included in the study** |
| --- | --- | --- | --- | --- | --- | --- | --- | --- | --- | --- | --- | --- |
| Axelsson IE29 | 1988 | 10 | 10 | 1.9 | 2.7 | Low | Low | Low | Low | Low | Low | Yes |
| Räihä NCR14 | 2002 | 28 | 29 | 1.8 | 2.2 | Low | Low | Low | Low | Low | Low | Yes |
| Turck D30 | 2006 | 50 | 51 | 1.8 | 2.6 | Low | Low | Low | Moderate | Low | Low | Yes |
| Koletzko B15 | 2009 | 298 | 313 | 1.8 | 2.2 | Low | Low | Low | Low | Low | Low | Yes |
| Labaune JM31 | 2009 | 82 | 82 | 1.8 | 2.7 | Low | Unclear | Low | Low | Low | Low | Yes |
| Socha P16 | 2011 | 236 | 328 | 1.8 | 2.2 | Low | Low | Low | Low | Low | Low | Yes |
| Trabulsi J32 | 2011 | 110 | 103 | 1.9 | 2.2 | Low | Moderate | Low | Low | Low | Low | Yes |
| Hascöet JM33 | 2011 | 39 | 38 | 1.8 | 2.5 | Low | Low | Low | Low | Low | Low | Yes |
| Escribano J17 | 2011 | 185 | 275 | 1.8 | 2.5 | Low | Low | Low | Low | Low | Low | Yes |
| Rzehak P34 | 2013 | 125 | 189 | 1.8 | 2.5 | Low | Low | Low | Low | Low | Low | Yes |
| Weber M18 | 2014 | 209 | 227 | 1.8 | 2.5 | Low | Low | Low | Low | Low | Low | Yes |
| Fledderman M35 | 2014 | 92 | 82 | 1.9 | 2.2 | Low | Moderate | Low | Low | Low | Unclear | Yes |
| Inostroza J19 | 2014 | 61 | 54 | 1.6 | 2.7 | Low | Low | Low | Low | Low | Low | Yes |
| Putet G36 | 2016 | 74 | 80 | 1.8 | 2.7 | Low | Low | Low | Low | Low | Low | Yes |
| Collel R37 | 2016 | 47 | 50 | 1.8 | 2.7 | Low | Moderate | Low | Low | Low | Unclear | Yes |

**Table 3. Excluded Studies in meta-analysis**

| **Author** | **Year** | **Reasons for exclusion** |
| --- | --- | --- |
| Lönnerdal B | 1990 | Minimum level of protein in 2.0g/100Kcal and cereals added |
| Heining JM | 1993 | Comparison of energy and protein intakes only between human milk and infant formula feeding babies |
| Alexy U | 199 | Evaluation of macronutrient ingestion in a group of infants |
| Lien EL | 2004 | Minimum level of protein in 2.1g/100Kcal |
| Günther ALB | 2006 | Study in children older than 2 years |
| Günther ALB | 2007 | Observational study of longitudinal report of diet |
| Davis AM | 2008 | Minimum level of protein in 2.08g/100Kcal |
| Yis U | 2010 | Correlation of serum ghrelin, leptin and insulin levels to the growth patterns in human milk vs infant formula feeding babies |
| Michaelsen KF | 2012 | Review study of effect of insulin and IGF1 on cardiovascular risk |
| Timbly | 2014 | Evaluation of effect of MFGM in infant formula with 1.8g/100Kcal of protein |
| Martin FPJ | 2015 | Evaluation of short chain fatty acids content in stool in children feeding with two different protein content in infant formula (1.65 vs 2.7 gr/100Kcal) |
| Kirchberg FF | 2015 | Evaluation of aminoacid profile in serum in children fedding two different infsnt formula protein content (1.9 vs 3.0g/100Kcal) |
